# Supplementary material for: Phase 1b/2a study of trastuzumab emtansine (T-DM1), paclitaxel, and pertuzumab in HER2-positive metastatic breast cancer
Source: PubMed Central journal article supplement (PMC4791863; doi:10.1186/s13058-016-0691-7), 2016-03-15
Supplement: 13058_2016_691_MOESM3_ESM.pdf [file 13058_2016_691_MOESM3_ESM.pdf]

**Additional file 3**

**Table S2** All-grade AEs (occurring in  $\geq 20\%$ ) or grade  $\geq 3$  AEs<sup>a</sup> (occurring in  $>3\%$ ) of the total patient population in phase 1b

|                       | Regimen 1<br>T-DM1 q3w +<br>paclitaxel qw (n=26),<br>n (%) |                | Regimen 2<br>T-DM1 q3w +<br>paclitaxel qw +<br>pertuzumab q3w<br>(n=10), n (%) |                | Regimen 3<br>T-DM1 qw + paclitaxel<br>qw (n=21), n (%) |                | Regimen 4<br>T-DM1 qw + paclitaxel<br>qw + pertuzumab q3w<br>(n=3),<br>n (%) |                | All<br>patients<br>(N=60) |
|-----------------------|------------------------------------------------------------|----------------|--------------------------------------------------------------------------------|----------------|--------------------------------------------------------|----------------|------------------------------------------------------------------------------|----------------|---------------------------|
|                       | Grade 1/2                                                  | Grade $\geq 3$ | Grade 1/2                                                                      | Grade $\geq 3$ | Grade 1/2                                              | Grade $\geq 3$ | Grade 1/2                                                                    | Grade $\geq 3$ | All grades                |
| Peripheral neuropathy | 16 (61.5)                                                  | 7 (26.9)       | 6 (60.0)                                                                       | 2 (20.0)       | 16 (76.2)                                              | 4 (20.0)       | 2 (66.7)                                                                     | 1 (33.3)       | 54 (90.0)                 |
| Fatigue               | 19 (73.1)                                                  | 4 (15.4)       | 8 (80.0)                                                                       | –              | 12 (57.1)                                              | 6 (28.6)       | 1 (33.3)                                                                     | 1 (33.3)       | 51 (85.0)                 |
| Epistaxis             | 9 (34.6)                                                   | –              | 6 (60.0)                                                                       | –              | 9 (42.9)                                               | –              | 3 (100)                                                                      | –              | 27 (45.0)                 |

|                                   |           |         |          |          |           |          |          |   |           |
|-----------------------------------|-----------|---------|----------|----------|-----------|----------|----------|---|-----------|
| Alopecia                          | 10 (38.5) | –       | 6 (60.0) | –        | 8 (38.1)  | –        | 1 (33.3) | – | 25 (41.7) |
| Diarrhoea                         | 7 (26.9)  | 1 (3.8) | 4 (40.0) | 1 (10.0) | 7 (33.3)  | 1 (4.8)  | 2 (66.7) | – | 23 (38.3) |
| Dry eye                           | 6 (23.1)  | 2 (7.7) | 3 (30.0) | –        | 9 (42.9)  | –        | 2 (66.7) | – | 22 (36.7) |
| Nausea                            | 8 (30.8)  | –       | 3 (30.0) | –        | 10 (47.6) | –        | –        | – | 21 (35.0) |
| Arthralgia                        | 8 (30.8)  | –       | 3 (30.0) | –        | 6 (28.6)  | 1 (4.8)  | 2 (66.7) | – | 20 (33.3) |
| Rash                              | 5 (19.2)  | –       | 7 (70.0) | –        | 6 (28.6)  | –        | 2 (66.7) | – | 20 (33.3) |
| Hypokalemia                       | 3 (11.5)  | 2 (7.7) | 2 (20.0) | 1 (10.0) | 3 (14.3)  | 4 (19.0) | 1 (33.3) | – | 16 (26.7) |
| Decreased appetite                | 7 (26.9)  | –       | 1 (10.0) | –        | 8 (38.1)  | –        | –        | – | 16 (26.7) |
| Constipation                      | 8 (30.8)  | –       | 3 (30.0) | –        | 3 (14.3)  | –        | 1 (33)   | – | 15 (25.0) |
| Cough                             | 8 (30.8)  | –       | 2 (20.0) | –        | 4 (19.0)  | –        | 1 (33.3) | – | 15 (25.0) |
| Upper respiratory tract infection | 8 (30.8)  | –       | 2 (20)   | –        | 4 (19.0)  | –        | 1 (33.3) | – | 15 (25.0) |

|                                          |          |          |          |          |          |          |          |          |           |
|------------------------------------------|----------|----------|----------|----------|----------|----------|----------|----------|-----------|
| Vision blurred                           | 4 (15.4) | 1 (3.8)  | 3 (30.0) | –        | 5 (23.8) | 1 (4.8)  | 1 (33.3) | –        | 15 (25.0) |
| Anaemia                                  | 2 (7.7)  | 4 (15.4) | 2 (20.0) | –        | 2 (9.5)  | 3 (14.3) | –        | 1 (33.3) | 14 (23.3) |
| Dyspnoea                                 | 6 (23.1) | –        | 1 (10.0) | –        | 6 (28.6) | –        | 1 (33.3) | –        | 14 (23.3) |
| Neutropenia                              | –        | 3 (11.5) | –        | 3 (30.0) | 2 (9.5)  | 5 (23.8) | –        | 1 (33.3) | 14 (23.3) |
| Dry Mouth                                | 5 (19.2) | –        | 1 (10.0) | –        | 6 (28.6) | –        | 1 (33.3) | –        | 13 (21.7) |
| Thrombocytopenia                         | 2 (7.7)  | 2 (7.7)  | 1 (10.0) | 1 (10.0) | 2 (9.5)  | 2 (9.5)  | –        | 1 (33.3) | 11 (18.3) |
| Cellulitis                               | 1 (3.8)  | 2 (7.7)  | 2 (20.0) | –        | 1 (4.8)  | 2 (9.5)  | –        | –        | 9 (15.0)  |
| Abdominal pain                           | 2 (7.7)  | 2 (7.7)  | –        | –        | 1 (4.8)  | 1 (4.8)  | –        | –        | 6 (10.0)  |
| Alanine<br>aminotransferase<br>increased | 1 (3.8)  | 1 (3.8)  | –        | 1 (10.0) | 2 (9.5)  | –        | –        | –        | 5 (8.3)   |
| Leukopenia                               | 2 (7.7)  | 1 (3.8)  | –        | 1 (10.0) | 1 (4.8)  | –        | –        | –        | 5 (8.3)   |

|                          |   |         |   |          |         |                      |   |          |         |
|--------------------------|---|---------|---|----------|---------|----------------------|---|----------|---------|
| Pneumonia                | – | –       | – | 2 (20.0) | –       | 2 <sup>b</sup> (9.5) | – | –        | 4 (6.7) |
| Hyponatremia             | – | 2 (7.7) | – | –        | 2 (9.5) | –                    | – | –        | 4 (6.7) |
| Hypertransaminase<br>mia | – | –       | – | 1 (10.0) | 1 (4.8) | –                    | – | 1 (33.3) | 3 (5.0) |
| Gastroenteritis          | – | 1 (3.8) | – | 1 (10.0) | –       | –                    | – | –        | 2 (3.3) |
| Pneumonitis              | – | 1 (3.8) | – | –        | –       | 1 (4.8)              | – | –        | 2 (3.3) |
| Sepsis                   | – | –       | – | –        | –       | 2 (9.5)              | – | –        | 2 (3.3) |

*AE* adverse event, *qw* weekly, *q3w* every 3 weeks, *T-DM1* trastuzumab emtansine

<sup>a</sup>There were 3 grade 5 events: sudden death (regimen 1), pneumonia (regimen 3), and acute subdural hematoma (regimen 3).

<sup>b</sup>One event was grade 5.
